# Supplementary material for: Cluster control in oligouranyl complexes of p-t-butylcalix[8]arene
Source: Royal Society of Chemistry journal article supplement (doi:10.1039/c0dt00667j), 2010-01-01
Supplement: c0dt00667j.pdf [file c0dt00667j.pdf]

**Table S1.** Uranium coordination environments, **1a-c**

| Atoms           | U(1)                   |           |           | U(2)                   |           |           |
|-----------------|------------------------|-----------|-----------|------------------------|-----------|-----------|
|                 | <b>1a</b> (anions 1,2) | <b>1b</b> | <b>1c</b> | <b>1a</b> (anions 1,2) | <b>1b</b> | <b>1c</b> |
| Distances (Å)   |                        |           |           |                        |           |           |
| U-O(0)          | 2.344(3), 2.339(3)     | 2.337(3)  | 2.336(3)  | 2.347(3), 2.353(3)     | 2.363(3)  | 2.333(3)  |
| U-O(101)        | 1.795(3), 1.793(3)     | 1.786(4)  | 1.797(3)  | 1.793(3), 1.792(3)     | 1.793(4)  | 1.782(3)  |
| U-O(102)        | 1.806(3), 1.784(3)     | 1.801(4)  | 1.802(3)  | 1.784(3), 1.794(3)     | 1.797(4)  | 1.788(3)  |
| U-O(21)         | 2.434(3), 2.494(3)     | 2.489(3)  | 2.564(3)  | 2.487(3), 2.473(3)     | 2.564(3)  | 2.566(3)  |
| U-O(71)         | 2.596(3), 2.613(3)     | 2.508(4)  | 2.441(3)  | 2.590(3), 2.532(3)     | 2.516(4)  | 2.461(3)  |
| U-O(11)         | 2.244(3), 2.208(3)     | 2.250(4)  | 2.277(3)  | 2.310(3), 2.320(3)     | 2.291(4)  | 2.273(3)  |
| U-O(81)         | 2.311(3), 2.304(3)     | 2.283(3)  | 2.274(3)  | 2.238(3), 2.257(3)     | 2.205(4)  | 2.281(3)  |
| O(21)...O(31)   | 2.493(5), 2.470(5)     | 2.512(5)  | 2.538(4)  | 2.517(6), 2.526(5)     | 2.561(5)  | 2.525(4)  |
| U...U           | 4.4890(4), 4.4647(3)   | 4.4955(7) | 4.4724(4) |                        |           |           |
| Angle (degrees) |                        |           |           |                        |           |           |
| O(0)-U-O(101)   | 85.1(1), 84.5(1)       | 85.7(2)   | 85.6(1)   | 84.5(1), 84.9(1)       | 84.8(2)   | 85.5(1)   |
| O(0)-U-O(102)   | 94.6(1), 95.49(5)      | 94.3(1)   | 95.9(1)   | 94.3(1), 94.7(1)       | 93.3(1)   | 96.4(1)   |
| O(0)-U-O(21)    | 70.1(1), 69.3(1)       | 68.3(1)   | 66.81(9)  | 69.2(1), 69.0(1)       | 65.9(1)   | 66.92(9)  |
| O(0)-U-O(71)    | 64.9(1), 65.9(1)       | 67.4(1)   | 69.10(9)  | 66.0(1), 67.0(1)       | 68.1(1)   | 68.7(1)   |
| O(0)-U-O(11)    | 145.4(1), 142.1(1)     | 142.5(1)  | 139.0(1)  | 143.2(1), 143.0(1)     | 138.8(1)  | 139.5(1)  |
| O(0)-U-O(81)    | 136.9(1), 137.1(1)     | 139.9(1)  | 141.3(1)  | 137.8(1), 140.2(1)     | 141.7(1)  | 141.59(9) |
| O(101)-U-O(102) | 177.9(1), 177.8(1)     | 178.9(2)  | 178.4(1)  | 178.8(2), 179.6(1)     | 177.0(2)  | 178.1(1)  |
| O(101)-U-O(21)  | 93.7(1), 94.8(1)       | 93.1(2)   | 93.1(1)   | 92.6(1), 93.0(1)       | 91.3(2)   | 94.1(1)   |
| O(101)-U-O(71)  | 92.6(1), 92.1(1)       | 91.4(2)   | 94.0(1)   | 94.4(1), 93.4(1)       | 93.8(2)   | 93.0(1)   |
| O(101)-U-O(11)  | 89.8(1), 87.6(1)       | 88.7(2)   | 89.9(1)   | 90.4(1), 91.2(1)       | 90.3(2)   | 89.8(1)   |

|                  |                    |          |           |                  |                    |          |           |
|------------------|--------------------|----------|-----------|------------------|--------------------|----------|-----------|
| O(101)-U-O(81)   | 90.2(1), 88.7(1)   | 89.5(1)  | 90.0(1)   | O(201)-U-O(41)   | 87.8(1), 89.3(1)   | 89.0(2)  | 89.4(1)   |
| O(102)-U-O(21)   | 88.1(1), 87.3(1)   | 88.0(1)  | 87.1(1)   | O(202)-U-O(61)   | 87.2(1), 86.9(1)   | 85.8(1)  | 86.5(1)   |
| O(102)-U-O(71)   | 85.4(1), 85.9(1)   | 87.6(2)  | 86.9(1)   | O(202)-U-O(31)   | 84.9(1), 86.4(1)   | 87.6(2)  | 87.8(1)   |
| O(102)-U-O(11)   | 91.7(1), 93.7(1)   | 92.0(2)  | 88.6(1)   | O(202)-U-O(51)   | 90.7(1), 89.2(1)   | 89.6(2)  | 88.7(1)   |
| O(102)-U-O(81)   | 88.7(1), 89.8(1)   | 89.8(1)  | 89.1(1)   | O(202)-U-O(41)   | 93.0(1), 90.9(1)   | 94.0(2)  | 89.2(1)   |
| O(21)-U-O(71)    | 133.8(1), 133.6(1) | 134.9(1) | 134.56(9) | O(61)-U-O(31)    | 133.7(1), 134.6(1) | 133.0(1) | 134.21(9) |
| O(21)-U-O(11)    | 76.2(1), 74.6(1)   | 75.1(1)  | 72.8(1)   | O(61)-U-O(51)    | 74.7(1), 74.6(1)   | 73.3(1)  | 73.4(1)   |
| O(71)-U-O(81)    | 72.6(1), 72.1(1)   | 73.0(1)  | 72.9(1)   | O(31)-U-O(41)    | 73.4(1), 74.2(1)   | 74.8(1)  | 73.7(1)   |
| O(21)-U-O(81)    | 153.0(1), 153.6(1) | 151.8(1) | 151.9(1)  | O(61)-U-O(41)    | 152.8(1), 150.8(1) | 152.2(1) | 151.49(9) |
| O(71)-U-O(11)    | 149.6(1), 151.6(1) | 149.9(1) | 151.88(9) | O(31)-U-O(51)    | 150.8(1), 150.0(1) | 153.2(1) | 151.8(1)  |
| O(11)-U-O(81)    | 77.1(1), 79.5(1)   | 77.0(1)  | 79.2(1)   | O(51)-U-O(41)    | 78.1(1), 76.3(1)   | 78.8(1)  | 78.3(1)   |
| U(1)-O(0)-O(2)   | 146.2(2), 144.2(1) | 146.1(2) | 146.6(1)  |                  |                    |          |           |
| U(1)-O(21)-C(21) | 126.1(3), 126.2(3) | 125.9(3) | 129.4(2)  | U(2)-O(61)-C(61) | 130.2(3), 130.1(3) | 129.8(3) | 128.7(2)  |
| U(1)-O(71)-C(71) | 130.1(3), 130.8(3) | 133.2(3) | 132.3(3)  | U(2)-O(31)-C(31) | 124.4(3), 126.6(3) | 126.2(4) | 129.3(2)  |
| U(1)-O(11)-C(11) | 136.4(3), 137.6(3) | 139.3(3) | 132.7(3)  | U(2)-O(51)-C(51) | 127.7(3), 129.1(3) | 128.6(4) | 134.0(3)  |
| U(1)-O(81)-C(81) | 130.7(3), 127.5(3) | 131.1(3) | 132.7(3)  | U(2)-O(41)-C(41) | 141.4(3), 135.9(2) | 143.5(4) | 130.2(2)  |

**Table S2.** Ligand conformational descriptors, **1a-c, 2**

|                                                                                                                                  | <b>1a</b> (cations 1,2)               | <b>1b</b>         | <b>1c</b>         | <b>2</b> | <b>1a</b> (cations 1,2)           | <b>1b</b> | <b>1c</b> | <b>2</b> |
|----------------------------------------------------------------------------------------------------------------------------------|---------------------------------------|-------------------|-------------------|----------|-----------------------------------|-----------|-----------|----------|
| Aromatic ring C <sub>6</sub> interplanar dihedral angles to the associated equatorial (phenolic-O) <sub>4</sub> planes (degrees) |                                       |                   |                   |          |                                   |           |           |          |
| Ring 1                                                                                                                           | 43.9(1), 44.7(1)                      | 43.2(2)           | 45.7(1)           | 50.2(2)  | 48.4(2), 50.1(1)                  | 52.0(2)   | 45.1(1)   | 48.3(3)  |
| 8                                                                                                                                | 49.4(1), 40.6(1)                      | 49.7(2)           | 44.3(1)           | 45.8(2)  | 41.2(1), 44.7(1)                  | 41.4(2)   | 48.4(1)   | 52.4(2)  |
| 2                                                                                                                                | 65.4(1), 65.2(1)                      | 69.3(2)           | 61.5(1)           | 64.5(2)  | 57.9(2), 59.8(1)                  | 60.5(2)   | 61.4(1)   | 65.52(3) |
| 7                                                                                                                                | 60.6(1), 57.9(1)                      | 62.5(2)           | 44.2(1)           | 63.9(2)  | 65.2(1), 65.1(1)                  | 67.8(2)   | 64.0(1)   | 61.9(2)  |
| $\chi^2(\text{O}_4)$                                                                                                             | 34, 261                               | 100               | 10.5              | 2.8      | $\chi^2(\text{O}_4)$              | 251       | 10.3      | 16.1     |
| $\delta\text{O}_{\text{max}}$ (Å)                                                                                                | 0.014(4), 0.041(4)                    | 0.023(5)          | 0.007(4)          | 0.008(8) | $\delta\text{O}_{\text{max}}$ (Å) | 0.048(5)  | 0.007(4)  | 0.020(8) |
| $\delta\text{O}(0)$ (Å)                                                                                                          | 0.408(5), 0.486(5)                    | 0.337(5)          | 0.414(4)          | 0.532(9) | $\delta\text{O}(0)$ (Å)           | 0.382(5)  | 0.423(4)  | 0.556(9) |
| $\delta\text{U}(1)$ (Å)                                                                                                          | 0.090(1), 0.071(1)                    | 0.050(1)          | 0.100(1)          | 0.096(2) | $\delta\text{U}(2)$ (Å)           | 0.065(1)  | 0.095(1)  | 0.023(1) |
| O <sub>4</sub> /O <sub>4</sub>                                                                                                   | 16.5(1), 17.8(1)                      | 19.2(1)           | 17.83(9)          | 6.2(2)   |                                   |           |           |          |
| Aromatic ring C <sub>6</sub> interplanar dihedral angles to the (phenolic-O) <sub>8</sub> 'plane' (degrees)                      |                                       |                   |                   |          |                                   |           |           |          |
| Ring 1                                                                                                                           | 39.9(1), 41.0(1)                      | 38.1(1)           | 41.0(1)           | 47.7(2)  | 44.7(2), 47.1(1)                  | 45.7(2)   | 40.2(1)   | 47.0(2)  |
| 8                                                                                                                                | 47.2(1), 46.4(1)                      | 44.7(2)           | 42.2(1)           | 47.5(2)  | 37.9(1), 41.0(1)                  | 38.0(2)   | 45.8(1)   | 41.2(2)  |
| 2                                                                                                                                | 59.4(1), 58.8(1)                      | 59.1(2)           | 55.0(1)           | 58.6(2)  | 51.4(1), 51.8(1)                  | 49.9(2)   | 55.6(1)   | 57.2(2)  |
| 7                                                                                                                                | 53.3(1), 51.3(1)                      | 51.1(1)           | 56.0(1)           | 55.7(2)  | 59.7(1), 58.7(1)                  | 57.7(2)   | 56.2(1)   | 58.2(2)  |
| $\chi^2(\text{O}_8)$                                                                                                             | 2x10 <sup>4</sup> , 2x10 <sup>4</sup> | 2x10 <sup>4</sup> | 3x10 <sup>4</sup> | 853      |                                   |           |           |          |
| $\delta\text{O}_{\text{max}}$ (Å)                                                                                                | 0.276(4), 0.280(4)                    | 0.293(4)          | 0.273(3)          | 0.107(8) |                                   |           |           |          |
| $\delta\text{O}(0)$ (Å)                                                                                                          | 0.827(4), 0.867(4)                    | 0.803(3)          |                   |          |                                   |           |           |          |
| $\delta\text{U}(1)$ Å)                                                                                                           | 0.170(1), 0.114(1)                    | 0.126(1)          | 0.157(1)          | 0.123(2) | $\delta\text{U}(2)$ Å)            | 0.111(2)  | 0.162(1)  | 0.039(2) |
| C <sub>6</sub> /C <sub>6</sub> interplanar dihedral angles                                                                       |                                       |                   |                   |          |                                   |           |           |          |
| 2/3                                                                                                                              | 75.4(2), 76.1(2)                      | 80.0(2)           | 80.1(2)           | 84.5(3)  | 77.7(2), 76.5(2)                  | 78.1(2)   | 82.9(2)   | 79.4(3)  |

|     |                  |         |         |         |     |                  |         |         |         |
|-----|------------------|---------|---------|---------|-----|------------------|---------|---------|---------|
| 1/2 | 80.2(2), 79.5(2) | 80.3(3) | 75.7(2) | 76.3(3) | 3/4 | 81.5(2), 82.9(2) | 78.6(2) | 75.9(1) | 73.1(3) |
| 7/8 | 77.5(2), 74.2(2) | 73.2(2) | 75.9(2) | 77.9(3) | 5/6 | 72.2(2), 74.5(2) | 73.2(2) | 75.8(2) | 74.8(3) |
| 1/8 | 81.7(2), 78.8(2) | 79.2(2) | 78.4(2) | 79.1(3) | 4/5 | 75.7(2), 83.4(2) | 78.3(2) | 78.7(2) | 78.8(3) |
| 1/4 | 23.8(2), 24.1(2) | 17.6(2) | 29.8(2) | 37.1(3) | 5/8 | 29.9(2), 31.4(2) | 26.0(2) | 23.1(2) | 35.4(3) |
| 2/7 | 64.1(2), 67.4(2) | 59.8(2) | 59.2(2) | 65.6(3) | 3/6 | 68.8(2), 62.8(2) | 61.5(2) | 62.6(2) | 61.9(3) |

In **1a**, the two O<sub>8</sub> planes of the independent cations are virtually parallel (interplanar dihedral angle 0.93(5)<sup>o</sup>). The ring numbering 1-8 in **1a-c** is transposed to 3-8, 1, 2 in **2**.

**Table S3.** Uranium atom environments, **2**.

$r$  is the U-O distance (Å); other entries in each matrix are the angles (degrees) subtended by the relevant atoms at the head of the row and column  $\theta$  (degrees) is the U-O-X angle.

(a) U(1)

| Atom  | $r$      | O(1)    | O(3)     | O(11)   | O(41)    | O(21)    | O(31)    | $\theta$ |
|-------|----------|---------|----------|---------|----------|----------|----------|----------|
| O(0)  | 2.223(6) | 78.1(2) | 100.3(2) | 69.6(2) | 71.2(2)  | 141.9(2) | 142.3(2) |          |
| O(1)  | 1.839(6) |         | 178.4(3) | 92.4(2) | 91.8(2)  | 93.3(2)  | 92.3(2)  |          |
| O(3)  | 1.781(6) |         |          | 87.6(3) | 87.2(3)  | 88.2(3)  | 88.6(3)  |          |
| O(11) | 2.459(6) |         |          |         | 138.8(2) | 73.8(2)  | 147.9(2) | 130.0(5) |
| O(41) | 2.398(6) |         |          |         |          | 146.8(2) | 72.7(2)  | 133.2(5) |
| O(21) | 2.299(6) |         |          |         |          |          | 74.2(2)  | 139.4(6) |
| O(31) | 2.340(6) |         |          |         |          |          |          | 135.4(6) |

(b) U(2)

| Atom  | $r$      | O(2)    | O(4)     | O(51)   | O(81)    | O(61)    | O(71)    | $\theta$ |
|-------|----------|---------|----------|---------|----------|----------|----------|----------|
| O(0)  | 2.235(5) | 77.0(2) | 100.6(3) | 67.5(2) | 68.8(2)  | 136.3(2) | 140.6(2) |          |
| O(2)  | 1.846(6) |         | 177.6(3) | 91.0(2) | 90.7(2)  | 90.8(2)  | 89.2(2)  |          |
| O(4)  | 1.791(6) |         |          | 89.9(2) | 88.6(2)  | 90.8(3)  | 92.8(2)  |          |
| O(51) | 2.522(5) |         |          |         | 134.6(2) | 71.1(2)  | 150.7(2) | 131.9(5) |
| O(81) | 2.451(6) |         |          |         |          | 154.2(2) | 74.7(2)  | 128.2(5) |
| O(61) | 2.282(6) |         |          |         |          |          | 79.6(2)  | 132.4(5) |
| O(71) | 2.187(5) |         |          |         |          |          |          | 138.8(5) |

(c) U(3)

| Atom  | $r$      | O(1)    | O(2)     | O(5)    | O(6)     | O(10)    | O(20)    | $\theta$ |
|-------|----------|---------|----------|---------|----------|----------|----------|----------|
| O(0)  | 2.262(6) | 65.5(2) | 65.7(2)  | 94.4(3) | 92.3(3)  | 145.2(2) | 137.3(2) |          |
| O(1)  | 2.492(6) |         | 131.1(2) | 88.7(2) | 93.2(2)  | 80.0(2)  | 157.1(2) |          |
| O(2)  | 2.445(6) |         |          | 92.2(2) | 89.8(2)  | 148.7(2) | 71.6(2)  |          |
| O(5)  | 1.772(6) |         |          |         | 175.3(3) | 90.9(3)  | 87.9(3)  |          |
| O(6)  | 1.778(6) |         |          |         |          | 85.2(2)  | 88.7(3)  |          |
| O(10) | 2.418(6) |         |          |         |          |          | 77.4(2)  | 119.5(4) |
| O(20) | 2.388(8) |         |          |         |          |          |          | 125.4(5) |

U(1)...U(2,3), U(2)...U(3) are 4.2952(6), 3.5786(5), 3.5742(5) Å. U(2)-O(0)-U(1,3), U(1)-O(0)-U(3) are 148.9(3), 105.3(2), 105.9(2)°. U(1,2)-O(1,2)-U(3) are 110.5(2), 112.1(3)°. Deviations of O(0; 1-4; 11-81; 10,20) from the  $U_3$  plane are: -0.001(6); -0.012(6), 0.058(6), 0.022(6); -2.288(6), -1.401(6), 1.404(6), 2.256(6), 2.317(6), 1.537(6), -1.313(6), -2.276(6); 0.170(7), -0.048(8) Å.
